# 1 **Spatial metabolomics of in situ, host-microbe interactions**

2

3 Benedikt Geier<sup>1</sup>; E. Maggie Sogin<sup>1</sup>; Dolma Michellod<sup>1</sup>; Moritz Janda<sup>1</sup>; Mario Kompauer<sup>3</sup>; Bernhard

4 Spengler<sup>3</sup>; Nicole Dubilier<sup>1,2</sup>; Manuel Liebeke<sup>1\*</sup>

5

6

7 <sup>1</sup>Max Planck Institute for Marine Microbiology, Bremen, Germany

8 <sup>2</sup>MARUM, University of Bremen, Bremen, Germany

9 <sup>3</sup>Institute of Inorganic and Analytical Chemistry, Justus Liebig University Giessen, Giessen, Germany

10 \*Corresponding author, email: [mlichebe@mpi-bremen.de](mailto:mlichebe@mpi-bremen.de), tel: +49 421 2028-822

11

12

13

14

15

16

17

18

19

20

21

## 22 **Abstract**

23 Spatial metabolomics describes the location and chemistry of small molecules involved in metabolic  
24 phenotypes, defense molecules and chemical interactions in natural communities. Most current  
25 techniques are unable to spatially link the genotype and metabolic phenotype of microorganisms in  
26 situ at a scale relevant to microbial interactions. Here, we present a spatial metabolomics pipeline  
27 (metaFISH) that combines fluorescence in situ hybridization (FISH) microscopy and high-resolution  
28 atmospheric pressure mass spectrometry imaging (AP-MALDI-MSI) to image host-microbe  
29 symbioses and their metabolic interactions. metaFISH aligns and integrates metabolite and fluorescent  
30 images at the micrometer-scale for a spatial assignment of host and symbiont metabolites on the same  
31 tissue section. To illustrate the advantages of metaFISH, we mapped the spatial metabolome of a deep-  
32 sea mussel and its intracellular symbiotic bacteria at the scale of individual epithelial host cells. Our  
33 analytical pipeline revealed metabolic adaptations of the epithelial cells to the intracellular symbionts,  
34 a variation in metabolic phenotypes in one symbiont type, and novel symbiosis metabolites. metaFISH  
35 provides a culture-independent approach to link metabolic phenotypes to community members in situ  
36 – a powerful tool for microbiologists across fields.

37

38

39

40

41

42

43

## 44 **Introduction**

45 Across host-microbe interactions, metabolites are the immediate effectors underlying the basic  
46 principles of recognition, communication and manipulation between the symbiotic partners<sup>1-4</sup>. The  
47 exchange of metabolites is governed by the cellular organization of the symbiosis, such as the extra- or  
48 intracellular location of the microorganisms<sup>5</sup>. To maintain this spatial organization, hosts and microbes  
49 have developed unique metabolites, such as membrane constituents<sup>6</sup>, antimicrobials<sup>7,8</sup> or recognition  
50 molecules<sup>9,10</sup>, that are located at specific sites. The spatial metabolome describes this site-specific  
51 chemistry of the fine scale distribution of metabolites, including metabolic phenotypes of associated  
52 partners, subpopulations and chemical microenvironments<sup>11-13</sup>. Therefore, the visualization of the  
53 distribution of metabolites is central to understanding the interactions of microorganisms with animal  
54 and plant tissues, and within microbial consortia<sup>14,15</sup>.

55 Metabolomics allows the detection of thousands of metabolites from a homogenate of a complex  
56 community in a single mass spectrometry (MS) measurement<sup>16</sup>. However, the homogenization  
57 destroys the spatial organization of host-microbe associations, cells, and metabolites. Linking the  
58 spatial metabolome to the individual partners of a community is a major challenge for the study of  
59 host-microbe and microbe-microbe interactions<sup>17-19</sup>.

60 Mass spectrometry imaging (MSI) is a technique that allows the visualization of the spatial  
61 metabolome of close-to natural-state samples in situ<sup>14,15,20</sup>. However, MSI alone cannot reveal the  
62 taxonomic identity of community members. A well-established method for identifying individual  
63 members of microbial communities is fluorescence in situ hybridization (FISH), in which fluorescent  
64 probes hybridize to the 16S rRNA gene of the targeted microorganisms<sup>19,21,22</sup>. To date, the only well-  
65 established MSI approach combined with FISH is nanoscale secondary ion mass spectrometry  
66 (nanoSIMS), which has become a powerful tool for linking isotope-based estimates of microbial  
67 activity to the identity of community members<sup>23,24</sup>. NanoSIMS does not allow the spatial imaging of  
68 metabolites.

69 To image metabolites in the lower micrometer range, recent technical advances<sup>25-28</sup> in matrix-assisted  
70 laser desorption ionization MSI (MALDI-MSI)<sup>29-31</sup> provide an excellent tradeoff between breadth of  
71 detectable metabolites, spatial resolution and decreased destructivity. These advances could bridge the  
72 gap in resolution to FISH microscopy, making structures of metabolite images and single host cells or  
73 small microbial communities comparable. Consequently, combining high spatial resolution MALDI-  
74 MSI with FISH would provide a spatial link between metabolic phenotypes and the taxonomic identity  
75 of microorganisms<sup>17,18</sup>. However, previous studies that combined MALDI-MSI with FISH, struggled  
76 with the destructivity of the MALDI laser when applying FISH after MALDI-MSI. They either  
77 applied the two methods to consecutive tissue sections of 12  $\mu\text{m}$  thickness<sup>5</sup>, or were limited to spatial  
78 resolutions above 50  $\mu\text{m}$  when applying both techniques to the same tissue surface<sup>17</sup>. Given these  
79 limitations, the combined approaches lack the resolution to sufficiently resolve the spatial metabolome  
80 of bacteria and most eukaryotic cells in three dimensions. We developed a MALDI-MSI and FISH  
81 pipeline capable of resolving the spatial metabolome of individual eukaryotic cells and bacterial  
82 microcolonies.

83 Most hosts and microbes are not yet culturable in their natural symbiotic association and visualizing  
84 how bacteria influence the host spatial metabolism is nearly impossible<sup>32</sup>. Therefore, we use  
85 *Bathymodiolus puteoserpensis* as an example for a non-culturable host-microbe symbiosis to  
86 demonstrate that our spatial metabolomics pipeline can be applied in situ. *B. puteoserpensis* is a deep-  
87 sea mussel found at hydrothermal vents on the Mid-Atlantic Ridge. It lives in symbiosis with two  
88 types of intracellular gammaproteobacterial symbionts that provide it with nutrition<sup>33</sup>. One is a sulfur  
89 oxidizer (SOX) that gains energy through the oxidation of reduced sulfur compounds and hydrogen,  
90 and fixes CO<sub>2</sub> into organic compounds. The other symbiont is a methane oxidizer (MOX) that uses  
91 methane as both an energy and a carbon source. The mussel hosts both mutualistic symbionts in  
92 specialized epithelial cells of the gill called bacteriocytes, reaching tremendous abundances of 10<sup>12</sup>  
93 bacterial cells in a few centimeters of gill tissue<sup>34</sup>. The gill is structured into distinct regions of  
94 colonized and bacteria-free tissue<sup>33,35</sup> where the spatial metabolism and metabolic interactions are  
95 unknown.

96 Here, we present our correlative imaging workflow for FISH microscopy after high resolution AP-  
97 MALDI-MSI on the same tissue section. We were able to find genome-predicted phenotypes and link  
98 the spatial metabolome to the taxonomic identity of the associated partners of the host-microbe and  
99 microbe-microbe communities.

100

## 101 **Results and Discussion**

102 Our application of AP-MALDI-MSI and FISH to the same tissue section at a 3  $\mu\text{m}$  MSI-pixel size  
103 presents a significant advance to spatial metabolomics in microbiology. It enables the co-identification  
104 of metabolites and bacterial phylotypes at a scale relevant to microbial interactions (Fig 1a). We use  
105 the term 'phylotype' here as a proxy for bacterial species<sup>36</sup>.

106 To analyze the correlative fluorescence and metabolite images, we developed a FISH-based spatial  
107 metabolome binning approach after which we termed our imaging and analysis pipeline **metaFISH**.  
108 Our metaFISH pipeline consists of three modules: (I) Sample preparation and correlative imaging of  
109 AP-MALDI-MSI before FISH (Fig. 1a); (II) Processing of the correlative imaging data, including a  
110 precise image alignment (Fig. 1b) and (III) A statistical analysis using our FISH-based spatial  
111 metabolome binning to spatially assign metabolite groups to fluorescence signals of host and  
112 symbionts (Figs 1c, d and 2c). Our pipeline provides correlation values indicating which metabolites  
113 correlate to host- or symbiotic tissues.

114 We applied metaFISH to investigate the symbiosis between the deep-sea mussel, *B. puteoserpentis*,  
115 and its intracellular microbial community (Fig. 2a). Using this unculturable model, we linked spatial  
116 metabolomes in the gill tissue to both the host and its bacteria. Our spatial metabolome data showed  
117 the mussel's intracellular bacteria alter the lipid composition in the symbiotic organ. Furthermore, we  
118 applied our approach to visualize metabolic heterogeneity within one single 16S rRNA phylotype<sup>33</sup>.  
119 Finally, using our pipeline in a discovery driven approach, we identified a novel group of metabolites

120 at the host-microbe interface specific for the symbiosis between mytilid deep-sea mussels and their  
 121 endosymbiotic MOX.

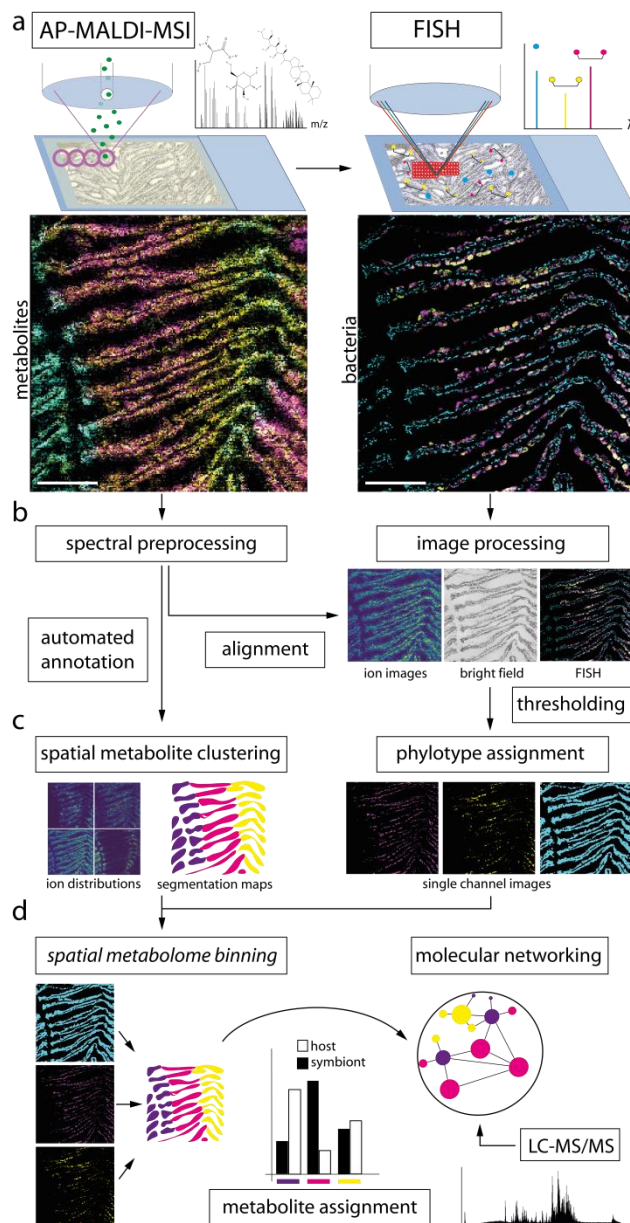

122  
 123 **Fig. 1 | Combining spatial metabolomics and taxon specific labeling in a correlative imaging and analysis**  
 124 **pipeline (metaFISH).** **a,** Metabolite heat-maps from high-resolution AP-MALDI-MSI (overlay of three ions in  
 125 cyan, yellow and magenta at a pixel size of 3 $\mu$ m) acquired before fluorescent in situ hybridizations (FISH) of the  
 126 same tissue section (example image showing DAPI-stained host nuclei in cyan and two types of FISHED  
 127 bacterial endosymbionts in magenta and yellow). Scale bars: 150  $\mu$ m. **b,** Spectral pre-processing, annotation,  
 128 image alignment of AP-MALDI-MSI and FISH images and background subtraction from microscopy data. **c,**  
 129 Spatial clustering of AP-MALDI-MSI data and image processing of FISH signals. **d,** Metabolite assignment to  
 130 host and symbionts. FISH-based spatial metabolome binning results (MF-ratio) can then be used to visualize  
 131 submetabolomes host and bacteria in molecular networks and to guide LC-MS/MS metabolite identification.

132 **Metabolite assignment to bacteria-rich and bacteria-free tissue through spatial cross**  
133 **correlations**

134 Spatial clustering of the AP-MALDI-MSI data revealed spatial partitioning of the gill metabolome.

135 Using metaFISH, we could categorize spatial metabolite clusters into bacteria-colonized and bacteria-  
136 free submetabolomes. After preprocessing of the raw AP-MALDI-MSI spectra, our MS data included  
137 2506 metabolite images across 54,289 pixels. Using a spatially aware clustering approach<sup>37</sup>, we  
138 grouped all molecule distributions across the gill into seven clusters with distinct biochemistry  
139 (Fig. 2c, d, Supplementary Fig. 6). The spatial clustering also separated chemical background signals  
140 (cluster 1 and 3) from the tissue-associated metabolome (cluster 2, 4, 5, 6)(7; Supplementary Fig. 7),  
141 as confirmed by ion map distributions and compound annotations. This chemical noise is common in  
142 AP-MALDI-MSI as it originates from the matrix, a crystalline layer applied to the sample surface to  
143 assist ionization. Therefore, we could exclude all ions from the background clusters 1 and 3 from  
144 further analysis of tissue metabolites.

145 With metaFISH, we calculated a ratio (MF-ratio) from the relative overlap between metabolite cluster  
146 and fluorescent signals, which we used as an indicator, if a cluster was linked to the mussel host or its  
147 symbiotic bacteria (Fig. 2c) (Supplementary text 4 and Supplementary Table 1). Our metaFISH  
148 analysis found two host- (MF-ratio > 1) and three symbiont-associated (MF-ratio < 1)  
149 submetabolomes (Fig. 2c, d).

150 The precise FISH-image correlations allowed us to classify clusters as bacterial sub-metabolomes (e.g.  
151 cluster 6 and 5) (Supplementary Fig. 7 and 9) even if they contained few pixels that were scattered  
152 throughout the tissue. Such visually random metabolite- and cluster distributions would have been  
153 considered unstructured noise<sup>38</sup> by stand-alone AP-MALDI-MSI analyses or visual inspection.

154 Supporting the identification of heterogeneous, low-signal metabolite patterns through label-specific  
155 correlative techniques will be crucial to differentiate noise from meaningful biological signals when  
156 moving towards single cell metabolomes of eukaryotes and bacteria.

157

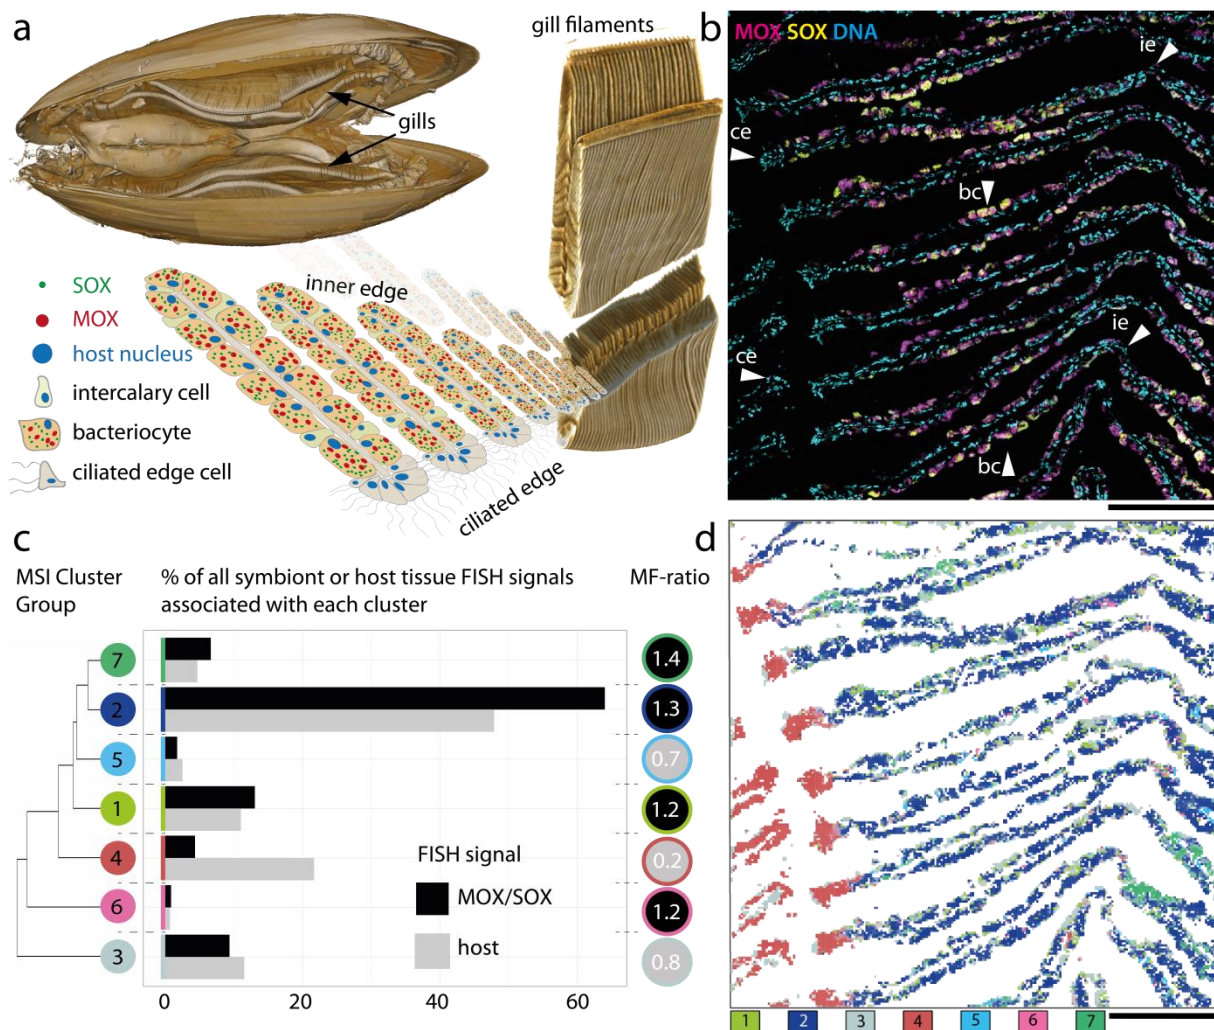

158

159 **Fig. 2 | Spatial metabolome binning based on FISH signals in the symbiotic organ of *B. puteoserpentis*.**

160 **a**, Micro-computed tomography 3D model of a *Bathymodiolus* deep-sea mussel (Supplementary text 3), virtual

161 dissection of the gill and horizontal sectioning plane through gill filaments showing the symbiont-containing

162 tissue. Schematic of the main cell types in the gills: symbiont-free ciliated edge cells, bacteriocytes with

163 methane-oxidizing symbionts (MOX, magenta) and sulfur-oxidizing symbionts (SOX, green), intercalary cells.

164 **b**, Fluorescence in situ hybridization (FISH): CMY overlay shows magenta channel, MOX; yellow channel,

165 SOX; cyan channel, host DNA stain (ce, ciliated edge; ie, forming inner edge; bc, bacteriocyte).

166 **c**, Hierarchical k-means clustering of the AP-MALDI-MSI data and FISH-based spatial metabolome binning represented as

167 MF-ratios assigning cluster groups 1-7 to the host or symbionts (Supplementary Table 1).

168 **d**, Segmentation maps of spatial clusters with their colors corresponding to **c**. Scale bars in **b** and **d**: 150  $\mu$ m.

169

170

171

172



## 173 **Visualization of distinct metabolic phenotypes of the endosymbiotic MOX**

174 The imaging of metabolite production can reveal phenotypic heterogeneity, for example within clonal  
175 communities that co-occur in the same microenvironment.<sup>11</sup> Visualization of the micro-scale  
176 metabolome and community structure allowed us to study the in situ phenotypes of the endosymbiotic  
177 MOX. Our metaFISH pipeline revealed variations in the spatial metabolome of the MOX phylotype.  
178 We identified hopanoids as a distinct group of MOX-specific metabolites in the metaFISH-classified  
179 bacterial clusters 6 and 7 (Supplementary Fig. 11 and Supplementary table 8). Hopanoids are lipids  
180 commonly found in membranes of methane-oxidizing bacteria. In bulk-measurements, they are often  
181 used as biomarkers<sup>6</sup> and we therefore used hopanoids as a proxy to locate the MOX symbionts in  
182 *B. puteoserpentis*. Unexpectedly, our micrometer-scale hopanoid maps showed a patchy distribution of  
183 single hopanoids compare to the 16S rRNA FISH signals of the MOX symbionts, and revealed clear  
184 differences in hopanoids among the MOX symbionts of a single host individual (Fig. 3,  
185 Supplementary Fig. 11). Our spatial clustering analyses supported our imaging analyses, and showed  
186 significant differences in the distribution aminobacteriohopane-triol in cluster 6 and bacteriohopane-  
187 tetrol in cluster 7 (Fig. 3d).

188 To find more hopanoids that were not clustered we visualized the AP-MALDI-MSI data with a  
189 chemical networking approach. During MSI data acquisition, unfragmented metabolites are detected,  
190 which allows us to translate exact mass differences (< 5 ppm) between two compounds into defined  
191 chemical modifications (e.g. hydroxylation, alkylation; see full list in Supplementary Table 2)<sup>39</sup>. These  
192 modifications can be visualized as edges, connecting individual metabolites represented as nodes in a  
193 network<sup>39</sup>. We highlighted spatial clusters and compound annotations in the AP-MALDI-MSI  
194 network, which showed two additional hopanoids, aminobacteriohopane-tetrol and anhydro-  
195 bacteriohopane-tetrol directly connected to the two clustered hopanoids (Fig. 3d, Supplementary text  
196 3, Supplementary Fig. 11).

197 The molecular network in fig. 3d showed that a single hydroxyl group that differed between  
198 aminobacteriohopane-triol and aminobacteriohopane-tetrol explained the different distributions  
199 between these two metabolites (Fig. 3b, c). Both hopanoids were patchily distributed, with

200 aminobacteriohopane-tetrol located towards the outer edge of the gills, and aminobacteriohopane-triol,  
201 concentrated in individual bacteriocytes, in the center of the gills (Figs 3a, b, and c). With our  
202 correlative imaging pipeline we could show that different hopanoid phenotypes are expressed by a  
203 single symbiont phylotype and differ across single epithelial gill cells. Therefore, metaFISH could be  
204 used to test the phenotypic heterogeneity in the distribution of biomarker molecules. Microbial  
205 communities are known to change their hopanoid composition across meter long oxygen gradients<sup>40</sup>.  
206 The gradual change of the two hopanoids (Fig. 3c) from the edge to the center of the gills could reflect  
207 a phenotypic adaptation of the intracellular MOX symbionts to such micro-scale gradients.

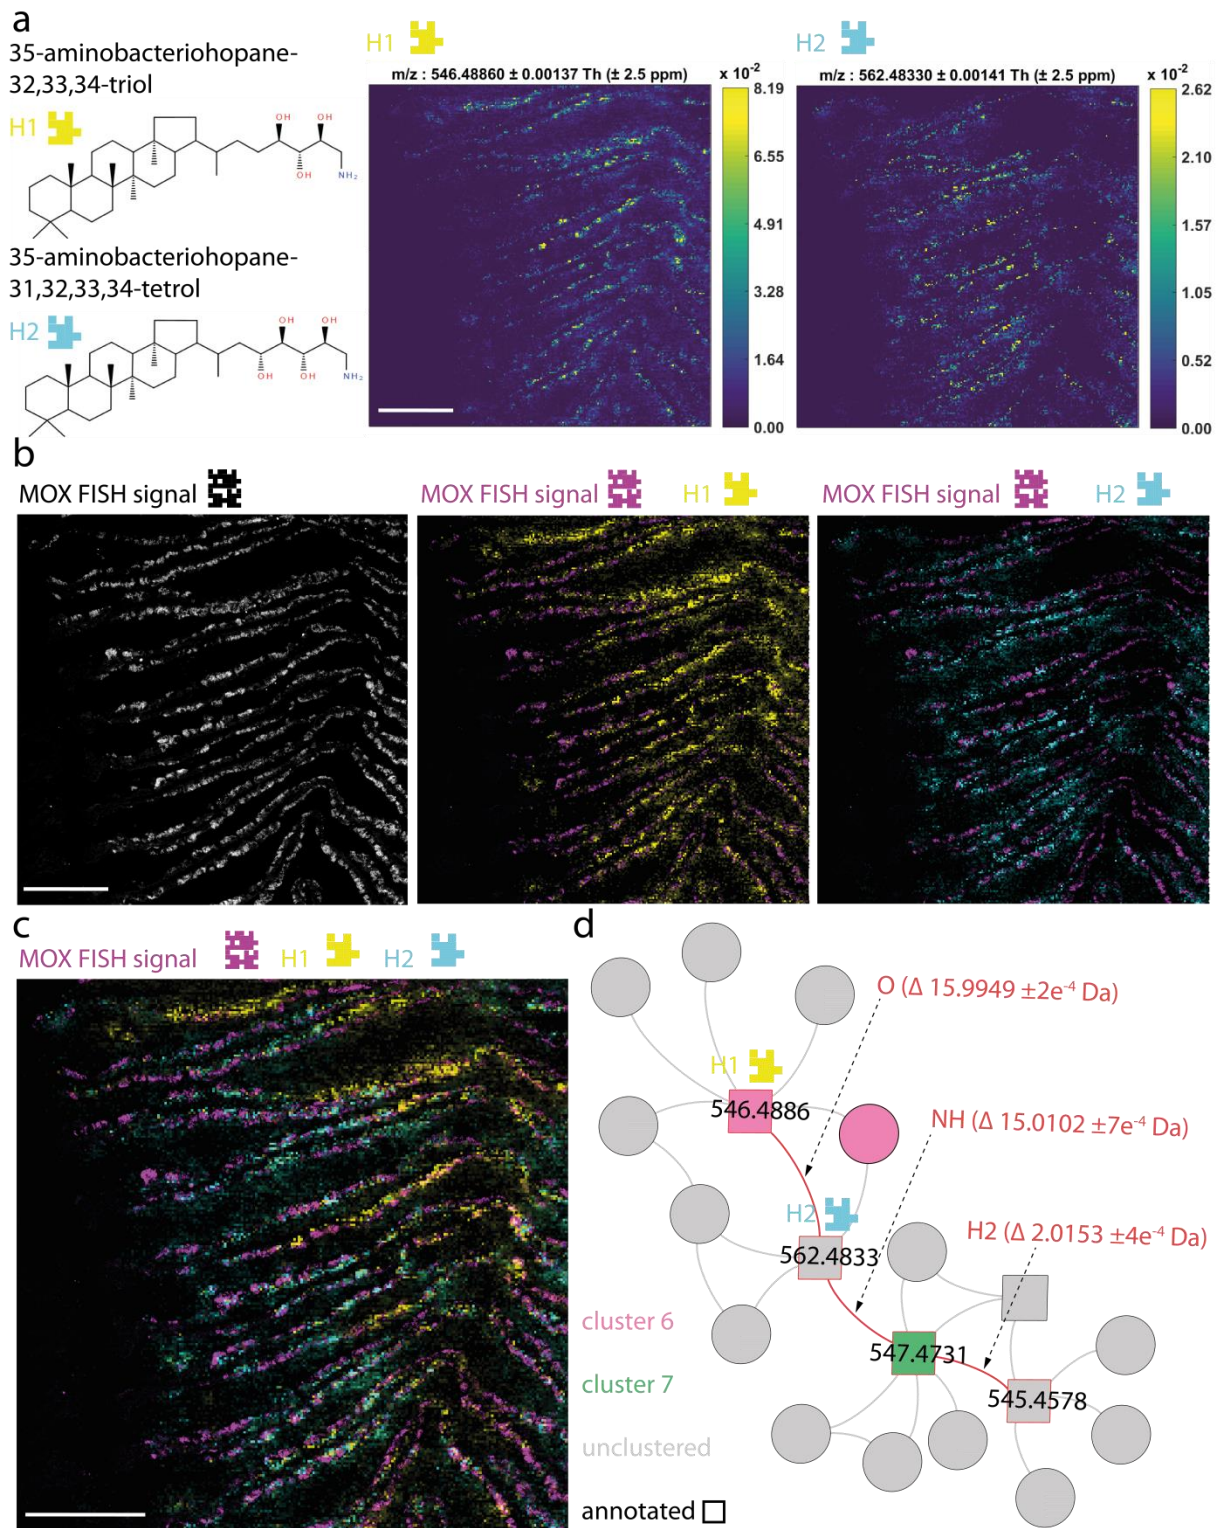

208

209 **Fig. 3 | Micrometer-scale metabolic heterogeneity of MOX symbionts in the gill.** **a**, Chemical structures and  
 210 ion maps of the two most prominent hopanoids (H1, yellow and H2, cyan). **b**, FISH signal of the hopanoid-  
 211 producing, methane-oxidizing symbiont (grey scale) and the ion maps of each hopanoid, H1 (yellow) and H2  
 212 (cyan) overlaid onto the FISH signal of the methane-oxidizing symbiont (magenta). **c**, Minor overlap (white  
 213 pixels) between the two abundant hopanoids: 35-aminobacteriohopane-32,33,34-triol (yellow) and 35-

214 aminobacteriohopane-31,32,33,34-tetrol (cyan) on top of the MOX signal (magenta). Both are produced by an  
215 identical 16S rRNA phylotype of the methane-oxidizing symbiont (magenta) and show strong spatial metabolic  
216 heterogeneity. **d**, Integration of spatial metabolome binning data and annotation of metabolites in a molecular  
217 network shows that the major spatial changes (colored nodes, spatial cluster 6 red, cluster 7 green) are associated  
218 with minor chemical side-chain modifications (red edges: gain/loss of O, H<sub>2</sub> and an amine group) between the  
219 annotated hopanoids (square nodes, red edges). Identification of bacteriohopane-32,33,34,35-tetrol (*m/z*  
220 547.4731) and 31-hydroxy-32,35-anhydro-bacteriohopane-tetrol (*m/z* 545.4578). Scale bars: 150 μm.  
221

## 222 **Metabolic landscape of the symbiotic organ**

223 In addition to functioning as a respiratory organ, the gill of *B. puteoserpentis* has acquired functions of  
224 a bioreactor, where the tremendous symbiont biomass<sup>34</sup> can grow under regulated conditions. Despite  
225 the well-known host-symbiont community structure of colonized and bacteria-free regions<sup>33,35</sup>, the  
226 spatial metabolome underlying the symbiotic organ is unknown. Many metabolites are related to each  
227 other chemically and spatially because they are involved in similar metabolic pathways and share  
228 biochemical reactions. We explored these chemical relations in our AP-MALDI-MSI networking  
229 approach where we integrated all 2506 detected molecules and highlighted the host- and symbiont-  
230 associated clusters (Fig. 4a).

231 The overall chemical space is divided into two main sub-networks separating host- and symbiont-  
232 associated metabolites (clusters 2, 4, 5, 6, and 7) from background matrix signals (clusters 1 and 3)  
233 (Fig. 4a, Supplementary Figs 7 and 10). Using the MSI metabolite annotation platform Metaspace<sup>41</sup>  
234 annotations show that the tissue-associated metabolites were annotated as phospholipids, such as  
235 phosphatidylcholines (PC), which are the major membrane components in eukaryotic cells<sup>42</sup> (clusters  
236 2 and 4; Fig. 4b and Fig.4c). The PC(36:2), C<sub>44</sub>H<sub>84</sub>NO<sub>8</sub>P+H<sup>+</sup>, *m/z* 786.6012 and the PC(32:1),  
237 C<sub>40</sub>H<sub>78</sub>NO<sub>8</sub>P+H<sup>+</sup>, *m/z* 732.5543, (Fig. 4c, Supplementary Figs 14, 16 and 17 and Supplementary table 8)  
238 were homogeneously distributed along each filament. This distribution was shared by over 60% of the  
239 ions in cluster 2, which could represent a baseline metabolomic signature of the gill tissue.

240 Most metabolites in our dataset from the largest bacteria-specific submetabolome (cluster 7) were  
241 annotated as triglycerides (TG) and were distributed similar to the TG(48:3), C<sub>51</sub>H<sub>92</sub>O<sub>6</sub>+Na<sup>+</sup>, *m/z*  
242 823.6794, and TG(52:3), C<sub>55</sub>H<sub>100</sub>O<sub>6</sub>+K<sup>+</sup>, *m/z* 895.7142 (Fig. 4d). These triglycerides formed a distinct

243 chemical sub-network, separated from the main phospholipid sub-network containing ions of cluster 2  
244 and 4 (Fig. 4a and Supplementary Fig. 10). The separation of phospholipids and triglycerides in the  
245 chemical networks reflects functional difference of these lipids in living cells. Phospholipids are  
246 membrane-bound whereas triglycerides are storage and transport lipids<sup>43</sup> and synthesized from the  
247 turnover and degradation of phospholipid membranes<sup>44</sup>. The digestion of bacteria inside bacteriocytes  
248 requires the breakdown of the bacterial phospholipid membranes<sup>45</sup>. Consequently, our observed spatial  
249 submetabolome containing high triglyceride abundances in the bacteriocyte region could show  
250 metabolites originating from the digestion of the intracellular symbionts by the host.

251 In the bacteria-free ciliated edge tissue, we localized a phosphonate lipid, phosphonoethanolamine  
252 ceramide PnE-Cer(34:2),  $C_{36}H_{72}N_2O_5P$ ,  $m/z$  643.5170 (Fig. 4b and Supplementary Figs 12 and 13).  
253 Phosphonates are a under-studied class of metabolites that serve as a phosphorus and nitrogen source  
254 for some marine bacteria<sup>46,47</sup>. The PnE-Cer(34:2) is highly concentrated in the ciliated edge and in the  
255 center of the gills. We hypothesize that the accumulation of this lipid represents a potential niche for  
256 phosphonate degraders. In closely related *Bathymodiolus* species<sup>35</sup>, epibionts that colonize the ciliated  
257 edge possess the genes required for the degradation of phosphonates<sup>48</sup>.

258 We found host metabolites in cluster 4 that were highly abundant in the symbiont-free ciliated edge  
259 and decreased gradually towards the symbiont-colonized tissues including the center of the gills  
260 (Fig. 2b and Supplementary Figs 7 and 15). Within this group of spatially similar metabolites, we  
261 identified PC(34:3),  $C_{42}H_{78}NO_8P+H^+$ ,  $m/z$  756.5536 (Fig. 4b and Supplementary Fig. 15). Unlike  
262 PnECer(34:2), PC(34:3) is negatively correlated to the presence of bacteria. PCs can be synthesized by  
263 only 10% of bacteria, and some intracellular bacteria have been shown to scavenge PCs as a choline  
264 source<sup>42</sup>. We hypothesize that distribution patterns like that of PC(34:3) indicates either a reduction in  
265 metabolite synthesis or degradation by the intracellular symbionts in the bacteriocytes.

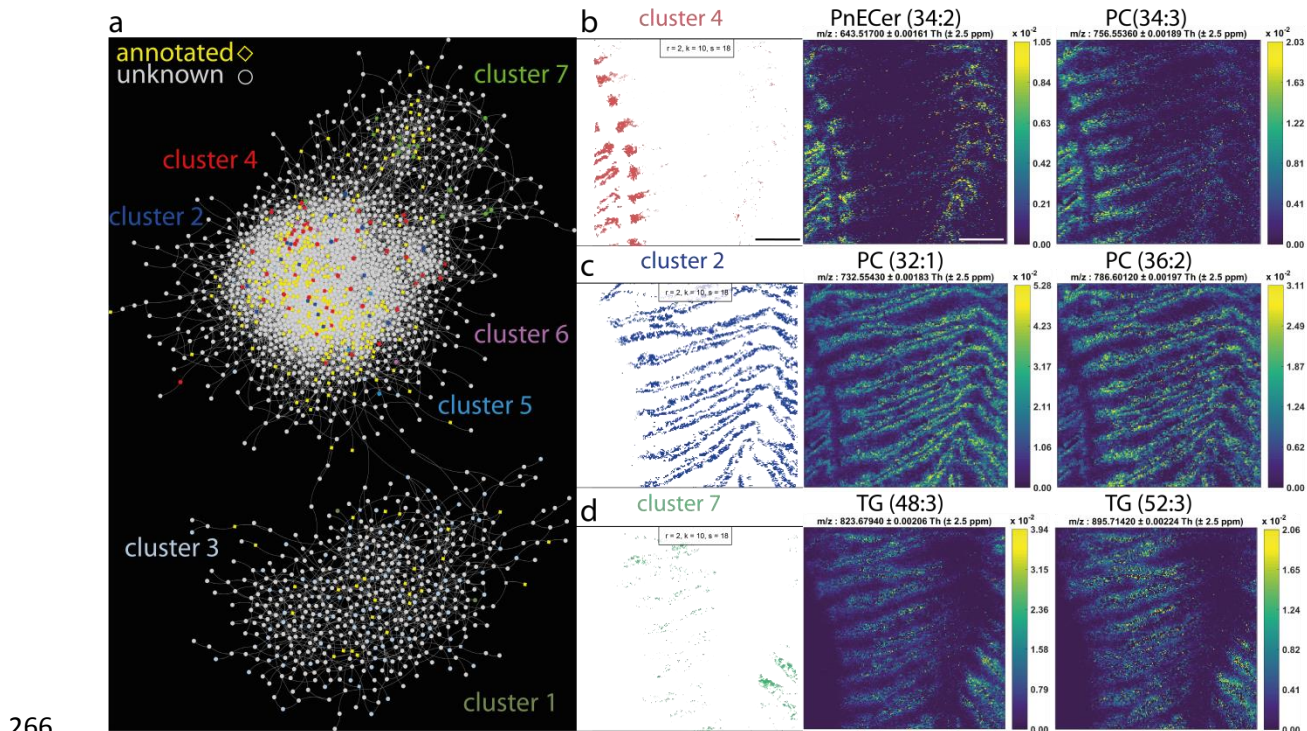

266

267 **Fig. 4 | Metabolic landscape of the symbiotic organ.** **a**, Molecular network visualizing all detected molecules,  
268 representing their spatial and potential chemical relationships. This MS1 based network facilitates data  
269 exploration by showing how similarly distributed metabolites (classified as clusters) and unclassified ions are  
270 related chemically. Nodes,  $m/z$  values of unfragmented parental ions; edges, defined molecular transformations  
271 calculated from  $\Delta m/z$ ; nodes colored with respect to cluster membership, yellow if not clustered; diamond  
272 shaped nodes match annotations  $\pm 10$  ppm; round grey nodes are unknown metabolites. **b–d**, Major spatial  
273 submetabolomes visualized as segmentation maps, and two representative metabolite distributions of annotated  
274 and identified metabolites. **b**, PnECer(34:2) is abundant in the ciliated and inner edges, whereas PC(34:3) shows  
275 a high abundance only in the ciliated edge and decreases towards the center of the gills. **c**, PC(32:1) and PC  
276 (36:2) are homogeneously distributed throughout the gill filaments. **d**, TG(48:3) and TG(52:3) show a high  
277 abundance only in the bacteria-rich regions and are absent in the bacteria-free ciliated edge and bacteria-poor  
278 inner edge. Scale bar 150  $\mu\text{m}$ .

279

## 280 **Discovery of new metabolites specific to the mussel–MOX symbiosis**

281 Invertebrate host-microbe symbioses are rich in specialized bioactive compounds<sup>49</sup>. A key challenge in  
282 natural product discovery is determining which of the thousands of measured metabolites serve  
283 regulatory roles or are metabolically active in microbial interactions<sup>50</sup>. MetaFISH provides a powerful  
284 tool to screen for metabolites involved in these chemical interactions at the host-microbe interface.

285 To demonstrate the potential of metaFISH for molecular prospecting, we identified the ion  
286  $m/z$  869.5375 as the metabolite with the highest co-localization with the FISH signal within bacterial  
287 submetabolome (cluster 2) after visual inspection (Fig. 5a and Supplementary Fig. 32). Using our AP-  
288 MALDI-MSI networking approach (Fig. 4a), we found four similarly distributed metabolites linked to  
289 the clustered ion  $m/z$  869.5375 through alkane chain length transformations ( $m/z$  813.4736,  $m/z$   
290 815.4902,  $m/z$  841.5062 and  $m/z$  843.5215 shown in Fig. 5d) (Supplementary Figs 18 and 19 and  
291 Supplementary Table 4). LC-MS/MS fragmentation spectra confirmed each metabolite as a homolog  
292 of  $m/z$  869.5375. For all five metabolites, the fragmentation pattern showed a terminal fatty acid with  
293 variable lengths (loss of  $C_{16}$ - $C_{20}$  shown in Fig. 5b) and a pentose moiety (loss of  $\Delta m/z$  132.04 Da  
294 shown in Fig. 5e) (Supplementary Figs 20-30 and Supplementary table 8). The core of those  
295 metabolites (without pentose moiety and fatty acid) was identified by exact mass determination using  
296 magnetic resonance mass spectrometry (MRMS) as  $C_{21}H_{25}N_6O_3$  ( $m/z$   $409.198213 \pm 0.128$  ppm,  
297 Supplementary table 9). The similarity of ion fragmentation was supported by LC-MS/MS based  
298 molecular networking with the Global Natural Products Social Molecular Networking platform  
299 (GNPS) (Supplementary Fig. 20 and Supplementary text 3)<sup>51</sup>. We termed the metabolites  $m/z$   
300 813.4736,  $m/z$  815.4902,  $m/z$  841.5062,  $m/z$  843.5215 and  $m/z$  869.5375 as the “800 group” based on  
301 their similar structures and spatial distributions (Supplementary Fig. 19 and Supplementary table 4).  
302 In our AP-MALDI-MSI network, we connected the metabolite  $m/z$  577.2604 (from now on termed  
303 577) to all metabolites of the 800 group with edges matching mass differences of different fatty acids  
304 (Supplementary Fig. 18 and Supplementary table 8). We could verify that the metabolite 577 was a  
305 variant of the 800 group without the fatty acid moiety, based on their fragmentation patterns, UV  
306 absorbance (Figs 5d, 5e and Supplementary Figs 21, 22, 29, 30 and 31, Supplementary table 4) and  
307 their shared core sum formula  $C_{21}H_{25}N_6O_3$  and  $C_{21}H_{29}N_6O_5 [M+2H_2O]^+$  ( $445.219322 \pm 0.164$  ppm;  
308 Supplementary table 9) as identified by MRMS. Unlike the 800 group, the metabolite 577 was  
309 abundant in gill tissue regions free of bacteria (cluster 5, metaFISH ratio = 0.7, Fig. 5b). Interestingly,  
310 overlaying the distributions (Fig. 5c) revealed that 577 in the host tissue surrounded the bacteriocytes  
311 in which the homologs of the 800 group are abundant. We hypothesize that the metabolite 577 could

312 be either a compound precursor, where long chain fatty acids are added through esterification resulting  
313 in members of the 800 group, or 577 could be a hydrolysis product of the 800 group, where the fatty  
314 acids are cleaved and 577 is accumulated in the host tissue. Our findings suggest novel chemical  
315 structures involved in the *Bathymodiolus* symbiosis, for which we found no database annotations or  
316 metabolites with similar fragmentation patterns across datasets in GNPS using its dereplication  
317 pipeline (Supplementary text 3)<sup>51</sup>.

318 To further investigate the role of this metabolite group, we used LC-MS/MS to screen 11 other  
319 symbiotic, deep-sea mytilid species (seven *Bathymodiolus*, three *Gigantidas* and one *Vulcanidas*)  
320 containing varying combinations of SOX and MOX symbionts from 9 different deep-sea vents  
321 (Supplementary Fig. 33 and Supplementary Table 3)<sup>52</sup>. Our screening revealed that both the 800 and  
322 577 metabolites only occurred in *Bathymodiolus* and *Gigantidas* mussels when the MOX symbiont  
323 was present. In contrast, we also screened a free-living MOX relative (*Methyloprofundus sedimenti*)<sup>53</sup>,  
324 which did not contain either the 577 or the 800 group (Supplementary Table 3).

325 Although the detailed structure, function and symbiotic partners responsible for the synthesis are still  
326 to be determined, these data indicate this metabolite group is involved in the symbiosis between deep-  
327 sea mussels and MOX symbiont (Supplementary Fig. 33 and Supplementary Table 3). Our metaFISH  
328 pipeline provides a valuable contribution to conventional secondary metabolite screening for  
329 metabolites that spatially and chemically mediate within host-microbe interactions.



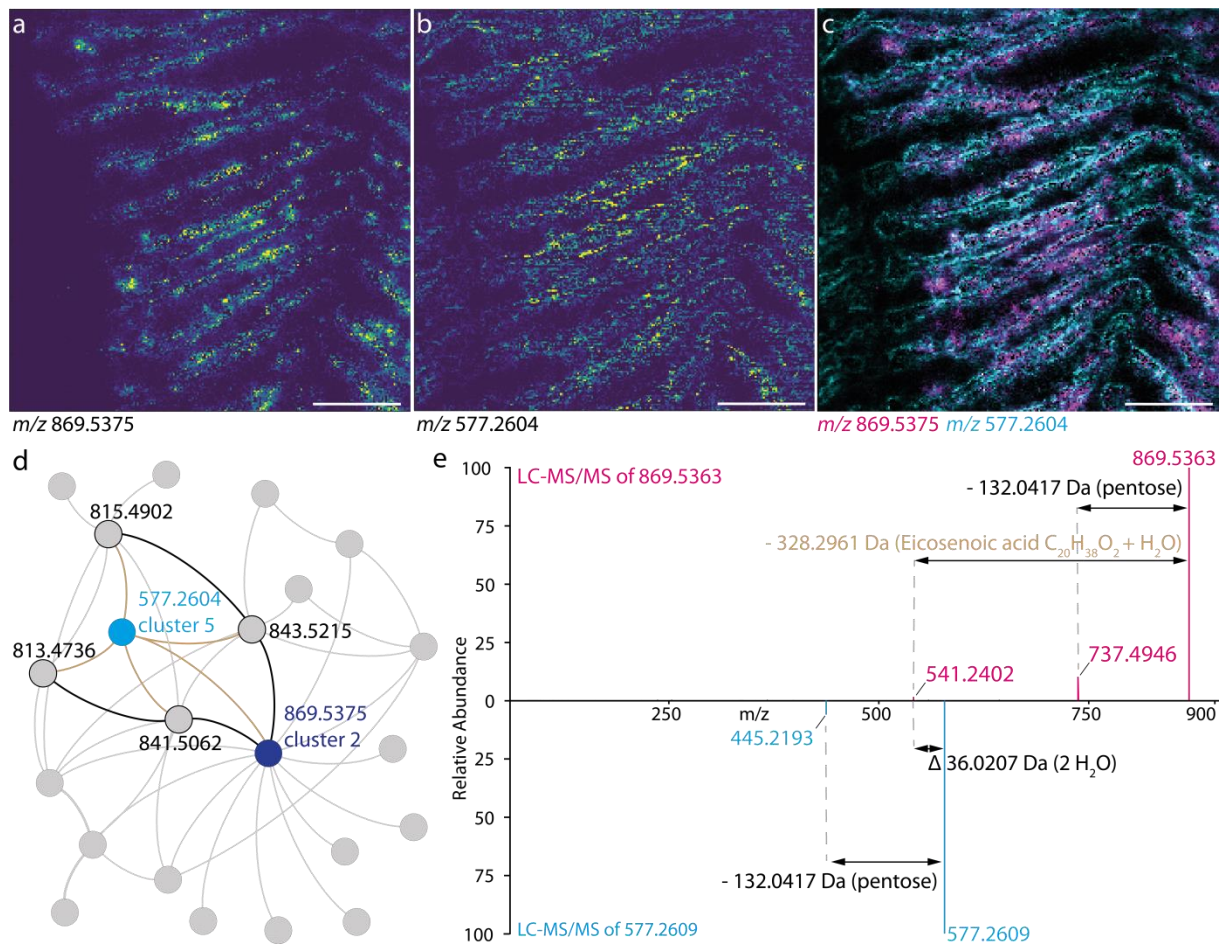

330

331 **Fig. 5 | Discovery of new symbiosis metabolites specific to the mussel–MOX symbiont interaction.**

332 **a**, Metabolite  $m/z$  869.5375 is strongly correlated with the symbiont communities and **b**,  $m/z$  577.2604 with host  
 333 tissue. **c**, MSI overlay of  $m/z$  869.5375 (magenta) and  $m/z$  577.2604 (cyan). Scale bars: 150  $\mu\text{m}$ . **d**, MALDI-MSI  
 334 sub-network showing “800 group” ions around  $m/z$  577.2604 (grey nodes: unclustered ions). Black edges linking  
 335 bacteria-correlated metabolites of the “800 group” represent mass differences of alkyl chain lengths. Brown  
 336 edges correspond to mass differences of fatty acids, present in the 800 group-metabolites and absent in the host-  
 337 correlated metabolite (577.2604, cyan node) (Supplementary Fig. 16). **e**, Characteristic LC-MS/MS  
 338 fragmentation pattern for  $m/z$  869.5363 (magenta) and for  $m/z$  577.2609 (cyan).  $m/z$  869.5363 (upper spectrum,  
 339 magenta) loses a pentose (black) and a fatty acid (brown).  $m/z$  577 (lower spectrum, cyan) only loses a pentose  
 340 (black). Fragment ion  $m/z$  541.2402 in the upper spectrum represents the host metabolite  $m/z$  577.2609-2  $\text{H}_2\text{O}$  ( $\Delta$   
 341 36.0207 Da).

342

343

344

345

## 346 **Conclusion**

347 Linking the spatial metabolome to individual partners of multimember communities, such as host-  
348 microbe associations, provides insights into their metabolic interactions. Metabolite imaging coupled  
349 with phylotype-specific labeling creates a direct link between the metabolism of a microorganism and  
350 its identity. The potential for additional labeling methods, for example of individual genes<sup>54</sup> or  
351 transcripts<sup>55</sup>, would provide an even higher resolution of genotypic and phenotypic correlations.  
352 With metaFISH, MALDI-MSI with FISH microscopy can link metabolomes to single eukaryotic host  
353 cells or micro-scale communities, and given the fast pace of technical improvements in spatial  
354 resolution, metabolite imaging will allow for discrimination at the scale of single bacteria. However,  
355 independent of the spatial resolution, metabolite imaging will rely on correlative approaches to  
356 identify the taxonomic identities underlying the vast phenotypic heterogeneity in eukaryotic and  
357 prokaryotic cells.

358 Researchers are beginning to apply MALDI-MSI to samples from natural environments beyond  
359 controlled laboratory conditions. Plant and animal tissues are commonly associated with microbes,  
360 which can significantly impact the metabolome of the host. If these microbes are overlooked, their  
361 contribution to the spatial metabolome will remain obscured as a host phenotype.

362 Applied to host-pathogen interactions, our metaFISH pipeline could be used to simultaneously  
363 visualize phenotypes of microbial pathogens and the metabolic immune response of the host. For  
364 instance, this could include stage specific phenotype changes during tubercle formation of  
365 *Mycobacterium tuberculosis*<sup>56</sup> or the transition from a recurrent to a chronic infection with  
366 *Pseudomonas aeruginosa*<sup>57</sup> during cystic fibrosis.

367 We envision that metaFISH will extend the capabilities of modern meta-omics for linking the identity  
368 of microbial community members to their metabolism and enable us to decipher the chemical  
369 language of microbes among each other and with their hosts.

370

## 371 Acknowledgements

372 We would like to thank the crew and captains of the scientific vessels Meteor (M64 M114 M126),  
373 Nautilus (Na 58), Sonne (SO253) and Atlantis (AT26–10, AT21-02) and their ROV pilots that helped  
374 us collect our extensive sample set. We thank Miguel Ángel González Porras for advice during FISH  
375 experiments, Merle Ücker for support in the lab, and Stephanie Markert for providing the  
376 *Bathymodiolus thermophilus* samples used for LC-MS/MS. We thank Matthias Witt from Bruker  
377 Daltonik GmbH for the exact mass measurements using scimaX<sup>TM</sup> MRMS. This work was funded by  
378 the Max Planck Society, the DFG Cluster of Excellence ‘The Ocean in the Earth System’ at MARUM  
379 (University of Bremen), a Gordon and Betty Moore Foundation Marine Microbiology Initiative  
380 Investigator Award through grant GBMF3811 to ND and a European Research Council Advanced  
381 Grant (BathyBiome, Grant 340535). For instrumental development, financial support by the Deutsche  
382 Forschungsgemeinschaft, DFG under grant Sp314/13-1 is gratefully acknowledged.

383  
384 **Conflict of interest.** BS is a consultant and MK is an employee of TransMIT GmbH, Giessen,  
385 Germany. All other authors declare no conflict of interest.

386  
387 **Data availability.** Download links for the raw files of fluorescence microscopy data, AP-MALDI-  
388 MSI and *on-tissue* AP-MALDI-MS/MS data and LC-MS/MS data are provided in the Supplementary  
389 Text 3. Data, analyzed with the online annotation and networking platforms Metaspace and GNPS can  
390 also be accessed through the provided links in the Supplementary Text 3.

391

## 392 References

- 393 1 Cleary, J. L., Condren, A. R., Zink, K. E. & Sanchez, L. M. Calling all hosts: Bacterial  
394 communication in situ. *Chem* **2**, 334-358, doi:10.1016/j.chempr.2017.02.001 (2017).  
395 2 Song, C. X. *et al.* Molecular and chemical dialogues in bacteria-protzoa interactions. *Sci Rep-*  
396 *Uk* **5**, doi:Artn 12837  
397 10.1038/Srep12837 (2015).  
398 3 Garg, N. *et al.* Spatial Molecular Architecture of the Microbial Community of a Peltigera  
399 Lichen. *Msystems* **1**, doi:UNSP e00139

- 400 10.1128/mSystems.00139-16 (2016).
- 401 4 Chagas, F. O., Pessotti, R. D., Caraballo-Rodriguez, A. M. & Pupo, M. T. Chemical signaling  
402 involved in plant-microbe interactions. *Chem Soc Rev* **47**, 1652-1704,  
403 doi:10.1039/c7cs00343a (2018).
- 404 5 Dubilier, N., Bergin, C. & Lott, C. Symbiotic diversity in marine animals: the art of harnessing  
405 chemosynthesis. *Nat Rev Microbiol* **6**, 725-740, doi:10.1038/Nrmicro1992 (2008).
- 406 6 Belin, B. J. *et al.* Hopanoid lipids: from membranes to plant-bacteria interactions. *Nat Rev*  
407 *Microbiol* **16**, 304-315, doi:10.1038/nrmicro.2017.173 (2018).
- 408 7 Kroiss, J. *et al.* Symbiotic streptomycetes provide antibiotic combination prophylaxis for wasp  
409 offspring. *Nat Chem Biol* **6**, 261-263, doi:10.1038/Nchembio.331 (2010).
- 410 8 Login, F. H. *et al.* Antimicrobial Peptides Keep Insect Endosymbionts Under Control. *Science*  
411 **334**, 362-365, doi:10.1126/science.1209728 (2011).
- 412 9 Finlay, B. B. & McFadden, G. Anti-immunology: Evasion of the host immune system by  
413 bacterial and viral pathogens. *Cell* **124**, 767-782, doi:10.1016/j.cell.2006.01.034 (2006).
- 414 10 Nyholm, S. V. & Graf, J. Knowing your friends: invertebrate innate immunity fosters beneficial  
415 bacterial symbioses. *Nat Rev Microbiol* **10**, 815-827, doi:10.1038/nrmicro2894 (2012).
- 416 11 Ackermann, M. A functional perspective on phenotypic heterogeneity in microorganisms.  
417 *Nat Rev Microbiol* **13**, 497-508, doi:10.1038/nrmicro3491 (2015).
- 418 12 Phelan, V. V., Liu, W. T., Pogliano, K. & Dorrestein, P. C. Microbial metabolic exchange-the  
419 chemotype-to-phenotype link. *Nat Chem Biol* **8**, 26-35, doi:10.1038/nchembio.739 (2012).
- 420 13 Shank, E. A. Considering the Lives of Microbes in Microbial Communities. *Msystems* **3**,  
421 doi:ARTN e00155-17
- 422 10.1128/mSystems.00155-17 (2018).
- 423 14 Dunham, S. J. B., Ellis, J. F., Li, B. & Sweedler, J. V. Mass Spectrometry Imaging of Complex  
424 Microbial Communities. *Accounts Chem Res* **50**, 96-104, doi:10.1021/acs.accounts.6b00503  
425 (2017).
- 426 15 Watrous, J. D. & Dorrestein, P. C. Imaging mass spectrometry in microbiology. *Nat Rev*  
427 *Microbiol* **9**, 683-694, doi:10.1038/nrmicro2634 (2011).
- 428 16 Brunetti, A. E. *et al.* An integrative omics perspective for the analysis of chemical signals in  
429 ecological interactions. *Chem Soc Rev* **47**, 1574-1591, doi:10.1039/c7cs00368d (2018).
- 430 17 Kaltenpoth, M., Strupat, K. & Svatos, A. Linking metabolite production to taxonomic identity  
431 in environmental samples by (MA)LDI-FISH. *Isme J* **10**, 527-531, doi:10.1038/ismej.2015.122  
432 (2016).
- 433 18 Dorrestein, P. C., Mazmanian, S. K. & Knight, R. Finding the Missing Links among Metabolites,  
434 Microbes, and the Host. *Immunity* **40**, 824-832, doi:10.1016/j.immuni.2014.05.015 (2014).
- 435 19 Tropini, C., Earle, K. A., Huang, K. C. & Sonnenburg, J. L. The Gut Microbiome: Connecting  
436 Spatial Organization to Function. *Cell Host Microbe* **21**, 433-442,  
437 doi:10.1016/j.chom.2017.03.010 (2017).
- 438 20 Passarelli, M. K. *et al.* The 3D OrbiSIMS-label-free metabolic imaging with subcellular lateral  
439 resolution and high mass-resolving power. *Nat Methods* **14**, 1175-+,  
440 doi:10.1038/Nmeth.4504 (2017).
- 441 21 Amann, R. I. *et al.* Combination of 16s Ribosomal-Rna-Targeted Oligonucleotide Probes with  
442 Flow-Cytometry for Analyzing Mixed Microbial-Populations. *Applied and environmental*  
443 *microbiology* **56**, 1919-1925 (1990).
- 444 22 Welch, J. L. M., Hasegawa, Y., McNulty, N. P., Gordon, J. I. & Borisy, G. G. Spatial organization  
445 of a model 15-member human gut microbiota established in gnotobiotic mice. *P Natl Acad*  
446 *Sci USA* **114**, E9105-E9114, doi:10.1073/pnas.1711596114 (2017).
- 447 23 Musat, N. *et al.* A single-cell view on the ecophysiology of anaerobic phototrophic bacteria. *P*  
448 *Natl Acad Sci USA* **105**, 17861-17866, doi:10.1073/pnas.0809329105 (2008).

- 449 24 Dekas, A. E., Poretsky, R. S. & Orphan, V. J. Deep-Sea Archaea Fix and Share Nitrogen in  
450 Methane-Consuming Microbial Consortia. *Science* **326**, 422-426,  
451 doi:10.1126/science.1178223 (2009).
- 452 25 Soltwisch, J. *et al.* Mass spectrometry imaging with laser-induced postionization. *Science* **348**,  
453 211-215, doi:10.1126/science.aaa1051 (2015).
- 454 26 Zavalin, A., Yang, J., Hayden, K., Vestal, M. & Caprioli, R. M. Tissue protein imaging at 1  $\mu$  m  
455 laser spot diameter for high spatial resolution and high imaging speed using transmission  
456 geometry MALDI TOF MS. *Anal Bioanal Chem* **407**, 2337-2342, doi:DOI 10.1007/s00216-015-  
457 8532-6 (2015).
- 458 27 Kompauer, M., Heiles, S. & Spengler, B. Atmospheric pressure MALDI mass spectrometry  
459 imaging of tissues and cells at 1.4- $\mu$  m lateral resolution. *Nat Methods* **14**, 90-96,  
460 doi:10.1038/Nmeth.4071 (2017).
- 461 28 Kompauer, M., Heiles, S. & Spengler, B. Autofocusing MALDI mass spectrometry imaging of  
462 tissue sections and 3D chemical topography of nonflat surfaces. *Nat Methods* **14**, 1156-+,  
463 doi:10.1038/nmeth.4433 (2017).
- 464 29 Spengler, B., Hubert, M. & Kaufmann, R. in *Proceedings of the 42nd Annual Conference on*  
465 *Mass Spectrometry and Allied Topics*. 1041 (Chicago).
- 466 30 Caprioli, R. M., Farmer, T. B. & Gile, J. Molecular imaging of biological samples: Localization of  
467 peptides and proteins using MALDI-TOF MS. *Anal Chem* **69**, 4751-4760, doi:Doi  
468 10.1021/Ac970888i (1997).
- 469 31 Spengler, B. & Hubert, M. Scanning microprobe matrix-assisted laser desorption ionization  
470 (SMALDI) mass spectrometry: instrumentation for sub-micrometer resolved LDI and MALDI  
471 surface analysis. *J Am Soc Mass Spectrom* **13**, 735-748, doi:10.1016/S1044-0305(02)00376-8  
472 (2002).
- 473 32 Gould, A. L. *et al.* Microbiome interactions shape host fitness. *Proc Natl Acad Sci U S A*,  
474 doi:10.1073/pnas.1809349115 (2018).
- 475 33 Duperron, S. *et al.* A dual symbiosis shared by two mussel species, *Bathymodiolus azoricus*  
476 and *Bathymodiolus puteoserpentis* (Bivalvia : Mytilidae), from hydrothermal vents along the  
477 northern Mid-Atlantic Ridge. *Environ Microbiol* **8**, 1441-1447, doi:10.1111/j.1462-  
478 2920.2006.01038.x (2006).
- 479 34 Szafranski, K. M., Piquet, B., Shillito, B., Lallier, F. H. & Duperron, S. Relative abundances of  
480 methane- and sulfur-oxidizing symbionts in gills of the deep-sea hydrothermal vent mussel  
481 *Bathymodiolus azoricus* under pressure. *Deep-Sea Res Pt I* **101**, 7-13,  
482 doi:10.1016/j.dsr.2015.03.003 (2015).
- 483 35 Assie, A. *et al.* A specific and widespread association between deep-sea *Bathymodiolus*  
484 mussels and a novel family of Epsilonproteobacteria. *Env Microbiol Rep* **8**, 805-813,  
485 doi:10.1111/1758-2229.12442 (2016).
- 486 36 Moreira, D. & López-García, P. in *Encyclopedia of Astrobiology* (eds Ricardo Amils *et al.*) 1-1  
487 (Springer Berlin Heidelberg, 2014).
- 488 37 Bemis, K. D. *et al.* Probabilistic Segmentation of Mass Spectrometry (MS) Images Helps Select  
489 Important Ions and Characterize Confidence in the Resulting Segments. *Molecular & Cellular*  
490 *Proteomics* **15**, 1761-1772, doi:10.1074/mcp.O115.053918 (2016).
- 491 38 Alexandrov, T. & Bartels, A. Testing for presence of known and unknown molecules in  
492 imaging mass spectrometry. *Bioinformatics* **29**, 2335-2342,  
493 doi:10.1093/bioinformatics/btt388 (2013).
- 494 39 Burgess, K. E. V., Borutzki, Y., Rankin, N., Daly, R. & Jourdan, F. MetaNetter 2: A Cytoscape  
495 plugin for ab initio network analysis and metabolite feature classification. *J Chromatogr B*  
496 **1071**, 68-74, doi:10.1016/j.jchromb.2017.08.015 (2017).
- 497 40 Kharbush, J. J., Ugalde, J. A., Hogle, S. L., Allen, E. E. & Aluwihare, L. I. Composite Bacterial  
498 Hopanoids and Their Microbial Producers across Oxygen Gradients in the Water Column of

- 499 the California Current (vol 79, pg 7491, 2013). *Applied and environmental microbiology* **80**,  
500 3283-3283, doi:10.1128/Aem.00847-14 (2014).
- 501 41 Alexandrov, T. *et al.* METASPACE: A community-populated knowledge base of spatial  
502 metabolomes in health and disease. *bioRxiv*, 539478, doi:10.1101/539478 (2019).
- 503 42 Geiger, O., Lopez-Lara, I. M. & Sohlenkamp, C. Phosphatidylcholine biosynthesis and function  
504 in bacteria. *Bba-Mol Cell Biol L* **1831**, 503-513, doi:10.1016/j.bbalip.2012.08.009 (2013).
- 505 43 Alvarez, H. M. & Steinbuchel, A. Triacylglycerols in prokaryotic microorganisms. *Appl*  
506 *Microbiol Biot* **60**, 367-376, doi:10.1007/s00253-002-1135-0 (2002).
- 507 44 Yoon, K., Han, D. X., Li, Y. T., Sommerfeld, M. & Hu, Q. Phospholipid:Diacylglycerol  
508 Acyltransferase Is a Multifunctional Enzyme Involved in Membrane Lipid Turnover and  
509 Degradation While Synthesizing Triacylglycerol in the Unicellular Green Microalga  
510 *Chlamydomonas reinhardtii*. *Plant Cell* **24**, 3708-3724, doi:10.1105/tpc.112.100701 (2012).
- 511 45 Barry, J. P. *et al.* Methane-based symbiosis in a mussel, *Bathymodiolus platifrons*, from cold  
512 seeps in Sagami Bay, Japan. *Invertebr Biol* **121**, 47-54 (2002).
- 513 46 Villarreal-Chiu, J. F., Quinn, J. P. & McGrath, J. W. The genes and enzymes of phosphonate  
514 metabolism by bacteria, and their distribution in the marine environment. *Front Microbiol* **3**,  
515 doi:Artn 19  
10.3389/Fmicb.2012.00019 (2012).
- 516 47 Martinez, A., Tyson, G. W. & DeLong, E. F. Widespread known and novel phosphonate  
517 utilization pathways in marine bacteria revealed by functional screening and metagenomic  
518 analyses. *Environ Microbiol* **12**, 222-238, doi:10.1111/j.1462-2920.2009.02062.x (2010).
- 519 48 Assié, A. *et al.* Horizontal acquisition of a patchwork Calvin cycle by symbiotic and free-living  
520 Campylobacterota (formerly Epsilonproteobacteria). *bioRxiv* (2018).
- 521 49 Esquenazi, E. *et al.* Visualizing the spatial distribution of secondary metabolites produced by  
522 marine cyanobacteria and sponges via MALDI-TOF imaging. *Mol Biosyst* **4**, 562-570,  
523 doi:10.1039/b720018h (2008).
- 524 50 Simmons, T. L. *et al.* Biosynthetic origin of natural products isolated from marine  
525 microorganism-invertebrate assemblages. *P Natl Acad Sci USA* **105**, 4587-4594, doi:DOI  
526 10.1073/pnas.0709851105 (2008).
- 527 51 Wang, M. X. *et al.* Sharing and community curation of mass spectrometry data with Global  
528 Natural Products Social Molecular Networking. *Nat Biotechnol* **34**, 828-837,  
529 doi:10.1038/nbt.3597 (2016).
- 530 52 Thubaut, J., Puillandre, N., Faure, B., Cruaud, C. & Samadi, S. The contrasted evolutionary  
531 fates of deep-sea chemosynthetic mussels (*Bivalvia*, *Bathymodiolinae*). *Ecol Evol* **3**, 4748-  
532 4766, doi:10.1002/ece3.749 (2013).
- 533 53 Tavormina, P. L. *et al.* *Methyloprofundus sedimenti* gen. nov., sp nov., an obligate  
534 methanotroph from ocean sediment belonging to the 'deep sea-1' clade of marine  
535 methanotrophs. *Int J Syst Evol Micr* **65**, 251-259, doi:10.1099/ijs.0.062927-0 (2015).
- 536 54 Barrero-Canosa, J., Moraru, C., Zeugner, L., Fuchs, B. M. & Amann, R. Direct-geneFISH: a  
537 simplified protocol for the simultaneous detection and quantification of genes and rRNA in  
538 microorganisms. *Environ Microbiol* **19**, 70-82, doi:10.1111/1462-2920.13432 (2017).
- 539 55 Yamaguchi, T. *et al.* In situ DNA-hybridization chain reaction (HCR): a facilitated in situ HCR  
540 system for the detection of environmental microorganisms. *Environ Microbiol* **17**, 2532-2541,  
541 doi:10.1111/1462-2920.12745 (2015).
- 542 56 Stewart, G. R., Robertson, B. D. & Young, D. B. Tuberculosis: A problem with persistence. *Nat*  
543 *Rev Microbiol* **1**, 97-105, doi:10.1038/nrmicro749 (2003).
- 544 57 Folkesson, A. *et al.* Adaptation of *Pseudomonas aeruginosa* to the cystic fibrosis airway: an  
545 evolutionary perspective. *Nat Rev Microbiol* **10**, 841-851, doi:10.1038/nrmicro2907 (2012).
- 546

## 547 **Methods**

548 **Sampling and on-board cryo-fixation.** The *Bathymodiolus puteoserpentis* specimen used for high  
549 resolution AP-MALDI-MSI was collected during the RV Meteor M126 cruise in 2016 at the  
550 Logatchev hydrothermal vent field on the Mid-Atlantic Ridge. The specimen was retrieved with the  
551 MARUM-Quest remotely operated vehicle (ROV) at the Irina II vent site at 3038 m depth,  
552 14°45'11.01"N and 44°58'43.98"W, and placed in an insulated container to prevent temperature  
553 changes during recovery. Gills were dissected from the mussel as soon as brought on board after ROV  
554 retrieval, submerged in precooled 2% w/v carboxymethyl cellulose gel (CMC,  $M_w \sim 700,000$ , Sigma-  
555 Aldrich Chemie GmbH) and snap-frozen in liquid N<sub>2</sub>. Samples were stored at -80 °C until use.  
556 Additional deep-sea mussels from other cruises and sites were snap-frozen but not embedded for AP-  
557 MALDI-MSI (Supplementary Table 5).

558

559 **Tissue sectioning.** The CMC-embedded gills were cross-sectioned at 10 µm thickness with a cryostat  
560 (Leica CM3050 S, Leica Biosystems Nussloch GmbH) at a chamber temperature of -35 °C and object  
561 holder at -22 °C. Individual sections were thaw-mounted onto coated Polysine® slides (Thermo  
562 Scientific) and subsequently frozen in the cryostat chamber. Slides with tissue sections were stored in  
563 slide containers with silica granules, to prevent air moisture condensation on the tissue upon removal  
564 from the freezer.

565

566 **Matrix and landmark application.** Before AP-MALDI matrix application, the sample was warmed  
567 to room temperature under a dry atmosphere in a sealed slide container (LockMailer™ microscope  
568 slide jar, Sigma-Aldrich, Steinheim, Germany), filled with silica granules (Carl Roth GmbH) to avoid  
569 condensation on the cold glass slide. The sample glass slide was marked with white paint around the  
570 tissue for orientation during image acquisition as previously described<sup>1</sup>. Additionally, optical images  
571 of the tissue section were acquired with a digital microscope (VHX-5000 Series, Keyence, Neu-  
572 Isenburg, Germany) prior to matrix application (Supplementary Fig. 1). To apply the matrix, we used

573 an ultrafine pneumatic sprayer system with N<sub>2</sub> gas (SMALDIPrep, TransMIT GmbH, Giessen,  
574 Germany)<sup>2</sup>, to deliver 100 µl of a 30 mg ml<sup>-1</sup> solution of 2,5-dihydroxybenzoic acid (DHB; 98%  
575 purity, Sigma-Aldrich, Steinheim, Germany) dissolved in acetone/water (1:1 v/v) containing 0.1%  
576 trifluoroacetic acid (TFA). To locate the field of view and facilitate laser focusing, a red marker was  
577 applied adjacent to the matrix-covered tissue section.

578

579 **High (spatial) resolution AP-MALDI-MSI.** AP-MALDI-MSI measurements were carried out at an  
580 experimental ion source setup<sup>2,3</sup>, coupled to a Fourier transform orbital trapping mass spectrometer (Q  
581 Exactive<sup>TM</sup> HF, Thermo Fisher Scientific GmbH, Bremen, Germany). The sample was rastered with  
582 233 × 233 laser spots with a step size of 3 µm without oversampling, resulting in an imaged area of  
583 699 × 699 µm (Supplementary Figs 2 and 3). AP-MALDI-MSI measurements were performed in  
584 positive mode for a mass detection range of 400–1200 Da and a mass resolving power of 240,000 (at  
585 200 *m/z*) (Supplementary Fig. 2). After AP-MALDI-MSI, the measured sample surface was recorded  
586 using a stereomicroscope (SMZ25, Nikon, Düsseldorf, Germany) (Supplementary Fig. 1).

587

588 **Magnetic resonance mass spectrometry:** Ultra-high mass resolution measurements were carried out  
589 with a magnetic resonance mass spectrometer (scimaX<sup>TM</sup>, Bruker Daltonik GmbH, Bremen,  
590 Germany). Samples were extracted with chloroform and the compounds further separated in a  
591 methanol washing step in which they stayed in the methanol fraction. These methanol extracts of the  
592 samples were measured by electrospray ionization in positive ion mode by direct syringe infusion in a  
593 mass range of 107–3000 Da using quadrupole detection and a mass resolving power of 650,000 (at  
594 400 *m/z*). The MS and MS/MS spectra were externally calibrated with NaTFA cluster. The MS spectra  
595 were additionally internally calibrated with Hexakis (1H, 1H, 3H-tetrafluoropropoxy) phosphazene  
596 (Apollo Scientific Ltd., compound PC0874). The molecular formula of detected compounds and  
597 fragments were determined with DataAnalysis 5.1 (Bruker Daltonik GmbH, Bremen, Germany)  
598 (Supplementary table 9).



599

600 **Fluorescence in situ hybridization.** The glass slide with the matrix-covered tissue section was  
601 submerged in a 2% PFA/PBS (137 mM NaCl, 2.7 mM KCl, 10 mM Na<sub>2</sub>HPO<sub>4</sub>, 2 mM KH<sub>2</sub>PO<sub>4</sub>)  
602 solution for one hour at room temperature, to wash off the matrix and stabilize the tissue. The fixation  
603 was followed by two 20 min washing steps in PBS, by carefully dipping the slide in 96% EtOH and air  
604 drying. The dried section was encircled with a liquid blocker (PAP-Pen, Science Services) on the glass  
605 slide to prevent leakage of the hybridization mixture during incubation<sup>4</sup>.

606 The hybridization mixture, modified after<sup>5</sup>, contained 5 ng µl<sup>-1</sup> of probe in hybridization buffer (35%  
607 formamide (v/v), NaCl 900 mM, 20 mM Tris-HCl (pH 7.5), 10% dextran sulfate (w/v), 0.02% (w/v)  
608 sodium dodecyl sulfate (SDS), 1% (w/v) Blocking Reagent (Roche, Basel, Switzerland)). We used  
609 specific 16S rRNA probes to target symbiotic SOX (BMARt\_193: 5'-CGAAGGTCCTCCACTTTA-  
610 3') and MOX (BNMARm\_845: 5'-GCTCCGCCACTAAGCCTA-3') bacteria<sup>6</sup>. BNMARm\_845  
611 contained one Cyanine 3 (Cy3) fluorophore at the 5'-end of the oligonucleotide, and BMARt\_193  
612 contained one MFP-ATTO488 fluorophore at each end for increased sensitivity (biomers.net GmbH,  
613 Ulm, Germany)<sup>7,8</sup>. A negative control with nonspecific binding (Non338: 5'-ACTCCTACGG-  
614 GAGGCAGC-3')<sup>9</sup>, labeled with Cy3, was hybridized on a subsequent tissue section during the same  
615 FISH experiment.

616 Tissue sections of sample and controls were hybridized with 20 µl of hybridization mixture, for 2 h in  
617 a saturated formamide-water atmosphere at 46 °C. Washing of the samples was conducted as  
618 described in<sup>6</sup>. Subsequently, the DNA of host and symbiotic bacteria was stained with 4',6-diamidino-  
619 2-phenylindole (DAPI) for 3 × 10 min at room temperature. For microscopy, sections were mounted  
620 with VECTASHIELD<sup>®</sup>.

621

622 **Fluorescence microscopy.** Overview tile-scans (0.32 µm / pixel) of the sample and the control were  
623 first acquired in the bright field and fluorescent channels with an automated epifluorescence  
624 microscope (Zeiss Axio Imager Z2.m, AxioCam MRm, Plan-Neofluar 20x/0.8) operated by a tile-  
625 scanning macro for Axio Vision (v. SE64 4.9.1, Carl Zeiss Microscopy GmbH, Germany).

626 Fluorochromes were excited with wavelengths 405 nm for DAPI (blue), 488 nm for MFP-ATTO488  
627 (green), and 546 nm for Cy3 (red). The false color RGB-image (Supplementary Fig. 4) was converted  
628 to cyan, magenta and yellow (CMY) in all main manuscript figures. Stitching of the tiles was  
629 performed with the “grid collection” stitching plugin in imagej (v. 1.50d). The target area that was  
630 measured with AP-MALDI-MSI was then rescanned with a confocal laser scanning microscope  
631 (CLSM) (Zeiss LSM 780) to improve the quality of the fluorescent images. The CLSM was equipped  
632 with an EMCCD Camera (Andor iXon Ultra 897 High Speed, Andor, UK). The excitation  
633 wavelengths were the same as those for the overview images, but using a Plan-Apochromat 20x/0.8  
634 objective lens.

635 To cover a larger area with the CLSM than measured with AP-MALDI-MSI a region of 25 tiles ( $5 \times$   
636  $5$ ) with each tile covering  $425.1 \mu\text{m} \times 425.1 \mu\text{m}$  ( $0.21 \mu\text{m} / \text{pixel}$ ) and 4  $z$  layers with  $5.72 \mu\text{m}$  per  
637 layer. The area measured with AP-MALDI-MSI ( $699 \mu\text{m} \times 699 \mu\text{m}$ ) overlapped with 6 tiles ( $3 \times 2$ ) of  
638 the CLSM scan, which were used for further analysis. The FISH signals were recorded from one focal  
639 plane, which was used for further processing and the correlative analysis (Supplementary Fig. 3). The  
640 tiles were stitched with ZEN black (v. 14.0.1.201, Carl Zeiss Microscopy GmbH, Germany) and  
641 readjusted with the MosaicJ plugin in imagej (v. 1.50d) (Supplementary Fig. 3).

642  
643 **Correlative image processing.** Alignment of AP-MALDI-MSI and FISH imaging data was  
644 performed in Matlab R2016a (Supplementary text 1). Before alignment, the MSI imaging dataset was  
645 inflated to the microscopy pixel size to prevent loss of structural information in the microscopy image.  
646 The RGB microscopy image was aligned to the MSI dataset via landmark registration using  
647 fitgeotrans (transformation type “similarity”). As template for the registration, a MSI consensus image  
648 was created (imagej v. 1.50d)<sup>10</sup> through a maximum intensity projection of four ion maps, chosen to be  
649 representative of the tissue structure (Supplementary Fig. 8). The transformation was based on 10  
650 corresponding landmarks on the tissue on the RGB microscopy image and the MSI consensus image.  
651 After alignment, the microscopy image was cropped to the same area as the MSI image. The pixel  
652 intensities for the three 8-bit single-channel images (RGB) were exported as an Excel table for further

653 processing in R. For further representation, we used CMY instead of RGB as color code. To determine  
654 the threshold between noise and fluorescent probe signal, we evaluated the threshold between signals  
655 and noise for each channel using the image segmenting app in Matlab. This grey value threshold was  
656 then used in the R pipeline. To represent an overall tissue signal, the bright field microscopy image  
657 from the overview tile-scan was aligned to the CLSM image (Supplementary Figs 1 and 8), segmented  
658 and transformed into a binary matrix to define “on tissue” and “off tissue” regions to perform  
659 background removal of MSI pixels (Supplementary Text 2 and Supplementary Fig. 8).

660

661 **AP-MALDI-MSI data preprocessing.** After imaging, the Thermo \*.raw files were centroided and  
662 converted to \*.mzML with MSConvert GUI (ProteoWizard, v. 3.0.9810,<sup>11</sup>) and then converted to  
663 \*.imZML using the imZML Converter 1.3<sup>12</sup>. The \*.imZML MALDI-MSI data was imported into R (v.  
664 3.4.0, Supplementary Text 2) and processed using the Cardinal package (v. 1.8.0,<sup>13</sup>). Briefly, data was  
665 imported using the readMSIData function with a mass accuracy of 1. The raw data was normalized to  
666 the total ion chromatogram and peak picking carried out using the adaptive method with a signal to  
667 noise ratio of 10.

668

669 **Correlative AP-MALDI-MSI and FISH data analysis.** Pixel-aligned FISH signal matrices of all  
670 three fluorescent channels (DAPI, SOX, MOX) were imported into R. Of the 255 greyscale values,  
671 background noise pixels were defined for intensities from 0 to 20 (see above for the choice of  
672 threshold). Pixels of each image matrix for the MOX, SOX and DAPI channels with intensities from  
673 21 to 255 were counted as signal.

674 The host-only tissue area was determined by subtracting the MOX and SOX symbiont pixels from the  
675 DAPI pixels. Furthermore, we used the “on/off-tissue” bright-field microscopy signal matrix to  
676 remove background pixels in AP-MALDI-MSI data (Supplementary Fig. 8). Thereby, we reduced data  
677 size and minimized the influence of background signals on the downstream analysis. To further reduce  
678 data dimensionality,  $m/z$  values were only retained if a peak was present in at least 10% of the pixel  
679 area of the spatially smallest fluorescent channel.

680 Spatial cluster analysis was performed on the reduced data using the spatial shrunken centroids (ssc)  
681 method, which performed unsupervised segmentation of the MSI dataset (Supplementary Fig. 6)<sup>14</sup>.  
682 This technique allowed us to select for the best-fit model of the appropriate number of metabolite  
683 clusters ( $k$ ) and informative metabolite features (Supplementary Fig. 5). We generated a Bray-Curtis  
684 dissimilarity matrix with the `vegdist` function in the `vegan` package<sup>15</sup> from the mean spectra of the ssc  
685 cluster groups. We then used this dissimilarity matrix to visualize the similarity between clusters in a  
686 hierarchical tree (Fig. 2c, Supplementary Fig. 5, 6). Using both matrices of the aligned FISH signals  
687 and the cluster segmentation maps, we calculated the area overlap to define the percentage of  
688 fluorescent bacteria- and host signals per cluster (Supplementary Text 2 and 4).

689  
690 **Metabolite annotations of AP-MALDI-MSI data.** Identification of metabolites from AP-MALDI-  
691 MSI data was carried out with bioinformatic approaches using exact mass and isotope ratio matches of  
692 known metabolites from the databases HMDB<sup>16</sup>, ChEBI<sup>17</sup> and The LIPID MAPS Lipidomics Gateway  
693 (<http://www.lipidmaps.org/>). In addition, selected metabolites were analyzed via on-tissue MS2 and  
694 fragmentation pattern comparison and uploaded to the automated annotation platform Metaspace<sup>18,19</sup>.  
695 Putative annotations and their scoring were exported as a \*.csv list for further analysis.

696  
697 **Molecular networking.** Molecular networks were visualized in Cytoscape (v. 3.5.1)<sup>20</sup>, the AP-  
698 MALDI-MSI MS1 data with the MetaNetter 2<sup>21</sup> and the LC-MS/MS data with GNPS<sup>22</sup>. Community  
699 matching, dereplication and metabolite annotation of the network based on LC-MS/MS were  
700 conducted with the default settings of the respective GNPS pipelines (Supplementary Text 3).  
701 The MSI peak list was imported to create nodes, and a list with major chemical transformations  
702 without isotopes and matrix adducts was used to calculate the mass differences as edges between the  
703 nodes with Metanetter 2 (Supplementary Table S2). The networks were then created with the Allegro  
704 Layout application (v. 2.2.2) to avoid overlapping of nodes and to adjust the node to edge length ratio  
705 for visualization. Coloring and reshaping of nodes was performed in Cytoscape using the cluster and  
706 annotation data.

707

708 **Solvents for LC-MS/MS.** All organic solvents were LC-MS grade, using acetonitrile (ACN;  
709 Honeywell, Honeywell Specialty Chemicals Seelze GmbH), isopropanol (IPA; BioSolve,  
710 Valkenswaard, The Netherlands), and formic acid (FA; Sigma-Aldrich Biochemie GmbH Hamburg).  
711 Water was deionized by using the Astacus MembraPure system (MembraPure GmbH, Henningsdorf,  
712 Berlin, Germany).

713

714 **Lipid extraction for LC-MS/MS.** Lipids were extracted from small pieces of frozen gills (50–100  
715 mg) using a mixture of ACN, methanol (MeOH) and water (H<sub>2</sub>O) (2:2:1 v/v/v), by bead beating using  
716 a stainless steel bead (FastPrep®-24, MP) for 2 × 40 s at 4 m/s. The tissues were then centrifuged (2  
717 min, 15,600 g, 4 °C) and the supernatant transferred into HPLC vials for analysis.

718

719 **High resolution LC-MS/MS.** The analysis was performed using a QExactive Plus Orbitrap (Thermo  
720 Fisher Scientific) equipped with an HESI probe and a Vanquish Horizon UHPLC System (Thermo  
721 Fisher Scientific). The lipids were separated on an Accucore C30 column (150 × 2.1 mm, 2.6 µm,  
722 Thermo Fisher Scientific), at 40 °C, using a solvent gradient. Buffer A (60/40 ACN/H<sub>2</sub>O, 10 mM  
723 ammonium formate, 0.1% FA) and buffer B (90/10 IPA/ACN, 10 mM ammonium formate, 0.1%  
724 FA)<sup>23</sup> were used at a flow rate of 350 µl min<sup>-1</sup>. The lipids were eluted from the column with a gradient  
725 starting at 0% buffer B (Supplementary Table 6). The injection volume was 10 µl. In the same run, MS  
726 measurements were acquired in positive and negative mode for a mass detection range of 150–1500  
727 Da (Supplementary Table 7). The resolution of the mass analyzer was set to 70,000 for MS1 scans and  
728 35,000 for MS2 scans at 200 *m/z*. MS/MS scans of the eight most abundant precursor ions were  
729 acquired in positive and negative modes. Dynamic exclusion was enabled for 30 seconds and collision  
730 energy was set to 30 V.

731

732 **Data availability.** Download links for the raw files of fluorescence microscopy data, MALDI-MSI  
733 and *on-tissue* MALDI-MS/MS data and LC-MS/MS data are provided in the Supplementary Text 3.

734 Data, analyzed with the online annotation and networking platforms Metaspace and GNPS can also be  
735 accessed through the provided links in the Supplementary Text 3.

736

## 737 **References**

- 738 1 Kaltenpoth, M., Strupat, K. & Svatos, A. Linking metabolite production to taxonomic identity  
739 in environmental samples by (MA)LDI-FISH. *Isme J* **10**, 527-531, doi:10.1038/ismej.2015.122  
740 (2016).
- 741 2 Kompauer, M., Heiles, S. & Spengler, B. Atmospheric pressure MALDI mass spectrometry  
742 imaging of tissues and cells at 1.4- $\mu$ m lateral resolution. *Nat Methods* **14**, 90-96,  
743 doi:10.1038/Nmeth.4071 (2017).
- 744 3 Kompauer, M., Heiles, S. & Spengler, B. Autofocusing MALDI mass spectrometry imaging of  
745 tissue sections and 3D chemical topography of nonflat surfaces. *Nat Methods* **14**, 1156-+,  
746 doi:10.1038/nmeth.4433 (2017).
- 747 4 Duperron, S. *et al.* Dual symbiosis in a Bathymodiolus sp mussel from a methane seep on the  
748 gabon continental margin (southeast Atlantic): 16S rRNA phylogeny and distribution of the  
749 symbionts in gills. *Applied and environmental microbiology* **71**, 1694-1700, doi:Doi  
750 10.1128/Aem.71.4.1694-1700.2005 (2005).
- 751 5 Pernthaler, A., Pernthaler, J. & Amann, R. Fluorescence in situ hybridization and catalyzed  
752 reporter deposition for the identification of marine bacteria. *Applied and environmental  
753 microbiology* **68**, 3094-3101, doi:Doi 10.1128/Aem.68.6.3094-3101.2002 (2002).
- 754 6 Duperron, S. *et al.* A dual symbiosis shared by two mussel species, Bathymodiolus azoricus  
755 and Bathymodiolus puteoserpentis (Bivalvia : Mytilidae), from hydrothermal vents along the  
756 northern Mid-Atlantic Ridge. *Environ Microbiol* **8**, 1441-1447, doi:10.1111/j.1462-  
757 2920.2006.01038.x (2006).
- 758 7 Amann, R. I. *et al.* Combination of 16s Ribosomal-Rna-Targeted Oligonucleotide Probes with  
759 Flow-Cytometry for Analyzing Mixed Microbial-Populations. *Applied and environmental  
760 microbiology* **56**, 1919-1925 (1990).
- 761 8 Stoecker, K., Dorninger, C., Daims, H. & Wagner, M. Double Labeling of Oligonucleotide  
762 Probes for Fluorescence In Situ Hybridization (DOPE-FISH) Improves Signal Intensity and  
763 Increases rRNA Accessibility. *Applied and environmental microbiology* **76**, 922-926,  
764 doi:10.1128/Aem.02456-09 (2010).
- 765 9 Wallner, G., Amann, R. & Beisker, W. Optimizing Fluorescent Insitu Hybridization with  
766 Ribosomal-Rna-Targeted Oligonucleotide Probes for Flow Cytometric Identification of  
767 Microorganisms. *Cytometry* **14**, 136-143, doi:DOI 10.1002/cyto.990140205 (1993).
- 768 10 Verbeeck, N. *et al.* Connecting imaging mass spectrometry and magnetic resonance imaging-  
769 based anatomical atlases for automated anatomical interpretation and differential analysis.  
770 *Bba-Proteins Proteom* **1865**, 967-977, doi:10.1016/j.bbapap.2017.02.016 (2017).
- 771 11 Chambers, M. C. *et al.* A cross-platform toolkit for mass spectrometry and proteomics. *Nat*  
772 *Biotechnol* **30**, 918-920, doi:10.1038/nbt.2377 (2012).
- 773 12 Race, A. M., Styles, I. B. & Bunch, J. Inclusive sharing of mass spectrometry imaging data  
774 requires a converter for all. *J Proteomics* **75**, 5111-5112, doi:10.1016/j.jprot.2012.05.035  
775 (2012).
- 776 13 Bemis, K. D. *et al.* Cardinal: an R package for statistical analysis of mass spectrometry-based  
777 imaging experiments. *Bioinformatics* **31**, 2418-2420, doi:10.1093/bioinformatics/btv146  
778 (2015).

- 779 14 Bemis, K. D. *et al.* Probabilistic Segmentation of Mass Spectrometry (MS) Images Helps Select  
780 Important Ions and Characterize Confidence in the Resulting Segments. *Mol Cell Proteomics*  
781 **15**, 1761-1772, doi:10.1074/mcp.O115.053918 (2016).
- 782 15 Dixon, P. VEGAN, a package of R functions for community ecology. *J Veg Sci* **14**, 927-930,  
783 doi:DOI 10.1111/j.1654-1103.2003.tb02228.x (2003).
- 784 16 Wishart, D. S. *et al.* HMDB 4.0: the human metabolome database for 2018. *Nucleic Acids Res*  
785 **46**, D608-D617, doi:10.1093/nar/gkx1089 (2018).
- 786 17 Hastings, J. *et al.* ChEBI in 2016: Improved services and an expanding collection of  
787 metabolites. *Nucleic Acids Res* **44**, D1214-D1219, doi:10.1093/nar/gkv1031 (2016).
- 788 18 Palmer, A. *et al.* FDR-controlled metabolite annotation for high-resolution imaging mass  
789 spectrometry. *Nat Methods* **14**, 57-60, doi:10.1038/Nmeth.4072 (2017).
- 790 19 Alexandrov, T. *et al.* METASPACE: A community-populated knowledge base of spatial  
791 metabolomes in health and disease. *bioRxiv*, 539478, doi:10.1101/539478 (2019).
- 792 20 Shannon, P. *et al.* Cytoscape: A software environment for integrated models of biomolecular  
793 interaction networks. *Genome Res* **13**, 2498-2504, doi:10.1101/gr.1239303 (2003).
- 794 21 Burgess, K. E. V., Borutzki, Y., Rankin, N., Daly, R. & Jourdan, F. MetaNetter 2: A Cytoscape  
795 plugin for ab initio network analysis and metabolite feature classification. *J Chromatogr B*  
796 **1071**, 68-74, doi:10.1016/j.jchromb.2017.08.015 (2017).
- 797 22 Wang, M. X. *et al.* Sharing and community curation of mass spectrometry data with Global  
798 Natural Products Social Molecular Networking. *Nat Biotechnol* **34**, 828-837,  
799 doi:10.1038/nbt.3597 (2016).
- 800 23 Breitkopf, S. B. *et al.* A relative quantitative positive/negative ion switching method for  
801 untargeted lipidomics via high resolution LC-MS/MS from any biological source.  
802 *Metabolomics* **13**, doi:ARTN 30  
803 10.1007/s11306-016-1157-8 (2017).

804

805
